# Supplementary material
Source: publisher figshare collection journal article supplement (https://acs.figshare.com/ndownloader/files/4376536)
Supplement: Supplementary file 1 [file 4376536]

 
data_dpa-theo_0m 
 
_audit_creation_method            SHELXL-97 
_chemical_name_systematic 
; 
 ? 
; 
_chemical_name_common             ? 
_chemical_melting_point           ? 
_chemical_formula_moiety          ? 
_chemical_formula_sum 
 'C21 H22 N6 O12' 
_chemical_formula_weight          550.45 
 
loop_ 
 _atom_type_symbol 
 _atom_type_description 
 _atom_type_scat_dispersion_real 
 _atom_type_scat_dispersion_imag 
 _atom_type_scat_source 
 'C'  'C'   0.0033   0.0016 
 'International Tables Vol C Tables 4.2.6.8 and 6.1.1.4' 
 'H'  'H'   0.0000   0.0000 
 'International Tables Vol C Tables 4.2.6.8 and 6.1.1.4' 
 'N'  'N'   0.0061   0.0033 
 'International Tables Vol C Tables 4.2.6.8 and 6.1.1.4' 
 'O'  'O'   0.0106   0.0060 
 'International Tables Vol C Tables 4.2.6.8 and 6.1.1.4' 
 
_symmetry_cell_setting            Triclinic  
_symmetry_space_group_name_H-M    P-1 
 
loop_ 
 _symmetry_equiv_pos_as_xyz 
 'x, y, z' 
 '-x, -y, -z' 
 
_cell_length_a                    7.0692(4) 
_cell_length_b                    8.0877(4) 
_cell_length_c                    20.8190(10) 
_cell_angle_alpha                 90.126(3) 
_cell_angle_beta                  94.010(3) 
_cell_angle_gamma                 98.789(3) 
_cell_volume                      1173.34(10) 
_cell_formula_units_Z             2 
_cell_measurement_temperature     296(2) 
_cell_measurement_reflns_used     ? 
_cell_measurement_theta_min       ? 
_cell_measurement_theta_max       ? 
 
_exptl_crystal_description        'plates' 
_exptl_crystal_colour             'colorless' 
_exptl_crystal_size_max           0.26 
_exptl_crystal_size_mid           0.18 
_exptl_crystal_size_min           0.08 
_exptl_crystal_density_meas       ? 
_exptl_crystal_density_diffrn     1.558 
_exptl_crystal_density_method     'not measured' 
_exptl_crystal_F_000              572 
_exptl_absorpt_coefficient_mu     0.130 
_exptl_absorpt_correction_type    none  
_exptl_absorpt_correction_T_min   ? 
_exptl_absorpt_correction_T_max   ? 
_exptl_absorpt_process_details    ? 
 
_exptl_special_details 
; 
 ? 
; 
 
_diffrn_ambient_temperature       296(2)

_diffrn_radiation_wavelength      0.71073

_diffrn_radiation_type            MoK\a

_diffrn_radiation_source          'fine-focus sealed tube'

_diffrn_radiation_monochromator   graphite

_diffrn_measurement_device_type   'CCD area detector'

_diffrn_measurement_method        'phi and omega scans'
_diffrn_detector_area_resol_mean  ? 
_diffrn_standards_number          ? 
_diffrn_standards_interval_count  ? 
_diffrn_standards_interval_time   ? 
_diffrn_standards_decay_%         ? 
_diffrn_reflns_number             14951 
_diffrn_reflns_av_R_equivalents   0.0273 
_diffrn_reflns_av_sigmaI/netI     0.0219 
_diffrn_reflns_limit_h_min        -8 
_diffrn_reflns_limit_h_max        8 
_diffrn_reflns_limit_k_min        -9 
_diffrn_reflns_limit_k_max        9 
_diffrn_reflns_limit_l_min        -23 
_diffrn_reflns_limit_l_max        24 
_diffrn_reflns_theta_min          0.98 
_diffrn_reflns_theta_max          24.50 
_reflns_number_total              3825 
_reflns_number_gt                 3234 
_reflns_threshold_expression      >2sigma(I) 
 
_computing_data_collection        'Bruker SMART'

_computing_cell_refinement        'Bruker SMART'

_computing_data_reduction         'Bruker SAINT'

_computing_structure_solution     'SHELXS-97 (Sheldrick, 1990)'

_computing_structure_refinement   'SHELXL-97 (Sheldrick, 1997)'

_computing_molecular_graphics     'Bruker SHELXTL'

_computing_publication_material   'Bruker SHELXTL'
 
_refine_special_details 
; 
 Refinement of F^2^ against ALL reflections.  The weighted R-factor wR and 
 goodness of fit S are based on F^2^, conventional R-factors R are based 
 on F, with F set to zero for negative F^2^. The threshold expression of 
 F^2^ > 2sigma(F^2^) is used only for calculating R-factors(gt) etc. and is 
 not relevant to the choice of reflections for refinement.  R-factors based 
 on F^2^ are statistically about twice as large as those based on F, and R- 
 factors based on ALL data will be even larger. 
; 
 
_refine_ls_structure_factor_coef  Fsqd  
_refine_ls_matrix_type            full 
_refine_ls_weighting_scheme       calc  
_refine_ls_weighting_details 
 'calc w=1/[\s^2^(Fo^2^)+(0.1000P)^2^+0.0362P] where P=(Fo^2^+2Fc^2^)/3' 
_atom_sites_solution_primary      direct 
_atom_sites_solution_secondary    difmap 
_atom_sites_solution_hydrogens    geom 
_refine_ls_hydrogen_treatment     mixed 
_refine_ls_extinction_method      none 
_refine_ls_extinction_coef        ? 
_refine_ls_number_reflns          3825 
_refine_ls_number_parameters      379 
_refine_ls_number_restraints      2 
_refine_ls_R_factor_all           0.0564 
_refine_ls_R_factor_gt            0.0490 
_refine_ls_wR_factor_ref          0.1635 
_refine_ls_wR_factor_gt           0.1565 
_refine_ls_goodness_of_fit_ref    1.172 
_refine_ls_restrained_S_all       1.195 
_refine_ls_shift/su_max           0.005 
_refine_ls_shift/su_mean          0.000 
 
loop_ 
 _atom_site_label 
 _atom_site_type_symbol 
 _atom_site_fract_x 
 _atom_site_fract_y 
 _atom_site_fract_z 
 _atom_site_U_iso_or_equiv 
 _atom_site_adp_type 
 _atom_site_occupancy 
 _atom_site_symmetry_multiplicity 
 _atom_site_calc_flag 
 _atom_site_refinement_flags 
 _atom_site_disorder_assembly 
 _atom_site_disorder_group 
C1 C 1.1009(4) 0.4910(4) 0.19326(13) 0.0587(7) Uani 1 1 d . . . 
H1A H 1.1021 0.4273 0.1544 0.088 Uiso 1 1 calc R . . 
H1B H 1.2279 0.5481 0.2050 0.088 Uiso 1 1 calc R . . 
H1C H 1.0149 0.5713 0.1865 0.088 Uiso 1 1 calc R . . 
C2 C 1.0119(3) 0.4559(3) 0.30402(11) 0.0414(6) Uani 1 1 d . . . 
C3 C 0.9363(5) 0.4241(3) 0.41766(12) 0.0587(7) Uani 1 1 d . . . 
H3A H 0.8031 0.4258 0.4236 0.088 Uiso 1 1 calc R . . 
H3B H 1.0046 0.5363 0.4201 0.088 Uiso 1 1 calc R . . 
H3C H 0.9888 0.3581 0.4507 0.088 Uiso 1 1 calc R . . 
C4 C 0.9185(3) 0.1821(3) 0.34351(10) 0.0368(5) Uani 1 1 d . . . 
C5 C 0.8358(4) -0.0793(3) 0.35324(13) 0.0510(6) Uani 1 1 d . . . 
H5 H 0.7939 -0.1833 0.3705 0.061 Uiso 1 1 calc R . . 
C6 C 0.9326(3) 0.1117(3) 0.28474(11) 0.0384(5) Uani 1 1 d . . . 
C7 C 0.9959(3) 0.2073(3) 0.23140(11) 0.0405(6) Uani 1 1 d . . . 
C8 C 0.2904(3) 0.0841(3) 0.47132(11) 0.0440(6) Uani 1 1 d . . . 
C9 C 0.3464(3) 0.0841(3) 0.40312(11) 0.0406(5) Uani 1 1 d . . . 
C10 C 0.3340(4) -0.0615(3) 0.36748(11) 0.0462(6) Uani 1 1 d . . . 
H10 H 0.2945 -0.1647 0.3858 0.055 Uiso 1 1 calc R . . 
C11 C 0.3808(4) -0.0523(3) 0.30435(12) 0.0546(7) Uani 1 1 d . . . 
H11 H 0.3711 -0.1487 0.2792 0.066 Uiso 1 1 calc R . . 
C12 C 0.4424(4) 0.1032(3) 0.27905(12) 0.0496(6) Uani 1 1 d . . . 
H12 H 0.4754 0.1138 0.2366 0.060 Uiso 1 1 calc R . . 
C13 C 0.4536(3) 0.2429(3) 0.31885(11) 0.0421(6) Uani 1 1 d . . . 
C14 C 0.5214(4) 0.4164(4) 0.29418(14) 0.0531(7) Uani 1 1 d . . . 
C15 C 0.2735(3) 0.8982(3) 0.09706(11) 0.0417(6) Uani 1 1 d . . . 
C16 C 0.3519(3) 0.8327(3) 0.03857(10) 0.0359(5) Uani 1 1 d . . . 
C17 C 0.2666(3) 0.8413(3) -0.02317(11) 0.0419(5) Uani 1 1 d . . . 
H17 H 0.1556 0.8891 -0.0303 0.050 Uiso 1 1 calc R . . 
C18 C 0.3505(4) 0.7771(3) -0.07374(11) 0.0452(6) Uani 1 1 d . . . 
H18 H 0.2954 0.7795 -0.1156 0.054 Uiso 1 1 calc R . . 
C19 C 0.5168(3) 0.7093(3) -0.06164(11) 0.0418(5) Uani 1 1 d . . . 
H19 H 0.5766 0.6663 -0.0949 0.050 Uiso 1 1 calc R . . 
C20 C 0.5927(3) 0.7071(3) 0.00179(10) 0.0355(5) Uani 1 1 d . . . 
C21 C 0.7735(3) 0.6371(3) 0.01958(12) 0.0410(6) Uani 1 1 d D . . 
H11A H 0.569(4) 0.763(6) 0.184(2) 0.132(16) Uiso 1 1 d D . . 
H11B H 0.777(8) 0.747(9) 0.154(3) 0.24(3) Uiso 1 1 d D . . 
H4N H 0.865(4) -0.140(4) 0.2594(15) 0.067(9) Uiso 1 1 d . . . 
H8O H 0.115(5) 1.026(4) 0.1233(10) 0.101(12) Uiso 1 1 d D . . 
N1 N 1.0362(3) 0.3773(2) 0.24550(9) 0.0406(5) Uani 1 1 d . . . 
N2 N 0.9552(3) 0.3506(2) 0.35417(9) 0.0403(5) Uani 1 1 d . . . 
N3 N 0.8580(3) 0.0632(2) 0.38699(9) 0.0433(5) Uani 1 1 d . . . 
N4 N 0.8795(3) -0.0581(3) 0.29212(10) 0.0483(5) Uani 1 1 d . . . 
N5 N 0.4056(3) 0.2359(2) 0.37951(9) 0.0428(5) Uani 1 1 d . . . 
N6 N 0.5127(3) 0.7670(2) 0.05116(8) 0.0364(4) Uani 1 1 d . . . 
O1 O 1.0367(3) 0.6067(2) 0.30982(9) 0.0589(5) Uani 1 1 d . . . 
O2 O 1.0137(3) 0.1528(2) 0.17691(8) 0.0595(5) Uani 1 1 d . . . 
O3 O 0.2916(3) 0.2086(2) 0.50299(9) 0.0666(6) Uani 1 1 d . . . 
O4 O 0.2393(3) -0.0685(2) 0.49203(8) 0.0607(5) Uani 1 1 d . . . 
H4O H 0.2068 -0.0642 0.5290 0.091 Uiso 1 1 calc R . . 
O5 O 0.5233(3) 0.5417(2) 0.32815(10) 0.0727(6) Uani 1 1 d . . . 
O6 O 0.5751(3) 0.4215(2) 0.23682(9) 0.0612(5) Uani 1 1 d D . . 
O7 O 0.3392(3) 0.8785(2) 0.15092(8) 0.0602(5) Uani 1 1 d . . . 
O8 O 0.1300(3) 0.9814(2) 0.08315(8) 0.0541(5) Uani 1 1 d D . . 
O9 O 0.8421(2) 0.6432(2) 0.07685(8) 0.0543(5) Uani 1 1 d . . . 
O10 O 0.8501(2) 0.5703(2) -0.02502(8) 0.0507(5) Uani 1 1 d D . . 
O11 O 0.6840(3) 0.7273(2) 0.18534(8) 0.0537(5) Uani 1 1 d D . . 
O12 O 0.4092(7) 0.5435(4) 0.4455(2) 0.1598(15) Uani 1 1 d . . . 
H6O H 0.600(7) 0.537(3) 0.225(2) 0.153(19) Uiso 1 1 d D . . 
H10O H 0.906(14) 0.494(13) 0.009(4) 0.35(5) Uiso 1 1 d D . . 
 
loop_ 
 _atom_site_aniso_label 
 _atom_site_aniso_U_11 
 _atom_site_aniso_U_22 
 _atom_site_aniso_U_33 
 _atom_site_aniso_U_23 
 _atom_site_aniso_U_13 
 _atom_site_aniso_U_12 
C1 0.0658(17) 0.0647(17) 0.0486(15) 0.0240(13) 0.0158(12) 0.0140(14) 
C2 0.0418(13) 0.0423(14) 0.0407(13) 0.0042(10) 0.0052(10) 0.0076(10) 
C3 0.086(2) 0.0501(15) 0.0403(15) -0.0103(12) 0.0109(13) 0.0099(14) 
C4 0.0344(11) 0.0378(12) 0.0391(13) 0.0013(10) 0.0051(9) 0.0073(9) 
C5 0.0549(15) 0.0401(13) 0.0587(16) 0.0045(12) 0.0121(12) 0.0057(11) 
C6 0.0418(12) 0.0382(12) 0.0367(12) -0.0032(9) 0.0068(9) 0.0088(9) 
C7 0.0372(12) 0.0505(14) 0.0375(13) 0.0000(10) 0.0050(9) 0.0172(10) 
C8 0.0454(13) 0.0425(14) 0.0430(13) 0.0013(11) 0.0073(10) 0.0013(10) 
C9 0.0344(12) 0.0436(13) 0.0434(13) 0.0070(10) 0.0048(9) 0.0040(9) 
C10 0.0521(14) 0.0416(13) 0.0429(14) 0.0032(10) 0.0065(11) 0.0000(11) 
C11 0.0627(16) 0.0536(15) 0.0469(15) -0.0021(12) 0.0108(12) 0.0035(12) 
C12 0.0488(14) 0.0587(16) 0.0401(13) 0.0072(12) 0.0065(11) 0.0026(12) 
C13 0.0337(12) 0.0492(14) 0.0436(13) 0.0112(11) 0.0055(9) 0.0054(10) 
C14 0.0418(14) 0.0564(17) 0.0600(17) 0.0198(13) 0.0052(12) 0.0031(11) 
C15 0.0431(13) 0.0400(12) 0.0435(14) 0.0023(10) 0.0088(10) 0.0083(10) 
C16 0.0377(12) 0.0314(11) 0.0389(12) 0.0009(9) 0.0062(9) 0.0045(9) 
C17 0.0361(12) 0.0433(13) 0.0473(13) 0.0030(10) 0.0036(10) 0.0094(10) 
C18 0.0508(14) 0.0502(14) 0.0346(12) -0.0006(10) -0.0016(10) 0.0098(11) 
C19 0.0478(13) 0.0401(13) 0.0383(12) -0.0024(10) 0.0081(10) 0.0069(10) 
C20 0.0386(12) 0.0310(11) 0.0368(12) 0.0021(9) 0.0064(9) 0.0035(9) 
C21 0.0393(12) 0.0350(12) 0.0495(14) 0.0055(10) 0.0095(11) 0.0056(10) 
N1 0.0429(11) 0.0428(11) 0.0382(10) 0.0073(8) 0.0084(8) 0.0103(8) 
N2 0.0524(12) 0.0360(10) 0.0334(10) -0.0037(8) 0.0061(8) 0.0078(8) 
N3 0.0496(11) 0.0407(11) 0.0406(11) 0.0058(9) 0.0089(8) 0.0071(9) 
N4 0.0581(13) 0.0367(11) 0.0508(13) -0.0077(10) 0.0078(10) 0.0082(9) 
N5 0.0394(11) 0.0420(11) 0.0471(12) 0.0087(9) 0.0068(8) 0.0044(8) 
N6 0.0375(10) 0.0351(10) 0.0375(10) 0.0014(8) 0.0070(8) 0.0064(8) 
O1 0.0789(13) 0.0351(10) 0.0625(11) 0.0015(8) 0.0114(9) 0.0050(8) 
O2 0.0739(13) 0.0742(13) 0.0369(10) -0.0055(9) 0.0115(8) 0.0284(10) 
O3 0.0918(15) 0.0494(11) 0.0573(12) -0.0041(9) 0.0247(10) -0.0017(10) 
O4 0.0891(15) 0.0474(10) 0.0456(11) 0.0088(8) 0.0226(10) 0.0024(9) 
O5 0.0942(16) 0.0451(11) 0.0800(14) 0.0077(10) 0.0278(12) 0.0044(10) 
O6 0.0688(13) 0.0573(12) 0.0573(12) 0.0172(9) 0.0174(9) 0.0030(10) 
O7 0.0726(13) 0.0757(13) 0.0393(10) 0.0003(9) 0.0085(9) 0.0318(10) 
O8 0.0522(10) 0.0651(12) 0.0510(11) -0.0062(9) 0.0094(8) 0.0261(9) 
O9 0.0507(10) 0.0707(12) 0.0447(10) 0.0010(8) -0.0025(8) 0.0225(9) 
O10 0.0484(10) 0.0609(11) 0.0484(10) 0.0007(8) 0.0109(8) 0.0227(8) 
O11 0.0649(12) 0.0547(11) 0.0429(10) 0.0035(8) 0.0057(9) 0.0128(9) 
O12 0.194(4) 0.112(3) 0.159(3) -0.010(2) 0.027(3) -0.029(3) 
 
_geom_special_details 
; 
 All esds (except the esd in the dihedral angle between two l.s. planes) 
 are estimated using the full covariance matrix.  The cell esds are taken 
 into account individually in the estimation of esds in distances, angles 
 and torsion angles; correlations between esds in cell parameters are only 
 used when they are defined by crystal symmetry.  An approximate (isotropic) 
 treatment of cell esds is used for estimating esds involving l.s. planes. 
; 
 
loop_ 
 _geom_bond_atom_site_label_1 
 _geom_bond_atom_site_label_2 
 _geom_bond_distance 
 _geom_bond_site_symmetry_2 
 _geom_bond_publ_flag 
C1 N1 1.478(3) . ? 
C1 H1A 0.9600 . ? 
C1 H1B 0.9600 . ? 
C1 H1C 0.9600 . ? 
C2 O1 1.210(3) . ? 
C2 N2 1.391(3) . ? 
C2 N1 1.406(3) . ? 
C3 N2 1.471(3) . ? 
C3 H3A 0.9600 . ? 
C3 H3B 0.9600 . ? 
C3 H3C 0.9600 . ? 
C4 N2 1.362(3) . ? 
C4 N3 1.363(3) . ? 
C4 C6 1.365(3) . ? 
C5 N3 1.331(3) . ? 
C5 N4 1.336(3) . ? 
C5 H5 0.9300 . ? 
C6 N4 1.379(3) . ? 
C6 C7 1.414(3) . ? 
C7 O2 1.238(3) . ? 
C7 N1 1.387(3) . ? 
C8 O3 1.201(3) . ? 
C8 O4 1.314(3) . ? 
C8 C9 1.500(3) . ? 
C9 N5 1.341(3) . ? 
C9 C10 1.379(3) . ? 
C10 C11 1.377(4) . ? 
C10 H10 0.9300 . ? 
C11 C12 1.384(4) . ? 
C11 H11 0.9300 . ? 
C12 C13 1.389(4) . ? 
C12 H12 0.9300 . ? 
C13 N5 1.329(3) . ? 
C13 C14 1.515(3) . ? 
C14 O5 1.232(3) . ? 
C14 O6 1.277(3) . ? 
C15 O7 1.204(3) . ? 
C15 O8 1.317(3) . ? 
C15 C16 1.501(3) . ? 
C16 N6 1.337(3) . ? 
C16 C17 1.387(3) . ? 
C17 C18 1.382(3) . ? 
C17 H17 0.9300 . ? 
C18 C19 1.379(3) . ? 
C18 H18 0.9300 . ? 
C19 C20 1.391(3) . ? 
C19 H19 0.9300 . ? 
C20 N6 1.332(3) . ? 
C20 C21 1.499(3) . ? 
C21 O9 1.253(3) . ? 
C21 O10 1.267(3) . ? 
N4 H4N 0.94(3) . ? 
O4 H4O 0.8200 . ? 
O6 H6O 0.96(2) . ? 
O8 H8O 0.928(15) . ? 
O10 H10O 1.00(9) . ? 
O11 H11A 0.90(2) . ? 
O11 H11B 0.95(2) . ? 
 
loop_ 
 _geom_angle_atom_site_label_1 
 _geom_angle_atom_site_label_2 
 _geom_angle_atom_site_label_3 
 _geom_angle 
 _geom_angle_site_symmetry_1 
 _geom_angle_site_symmetry_3 
 _geom_angle_publ_flag 
N1 C1 H1A 109.5 . . ? 
N1 C1 H1B 109.5 . . ? 
H1A C1 H1B 109.5 . . ? 
N1 C1 H1C 109.5 . . ? 
H1A C1 H1C 109.5 . . ? 
H1B C1 H1C 109.5 . . ? 
O1 C2 N2 122.2(2) . . ? 
O1 C2 N1 121.6(2) . . ? 
N2 C2 N1 116.2(2) . . ? 
N2 C3 H3A 109.5 . . ? 
N2 C3 H3B 109.5 . . ? 
H3A C3 H3B 109.5 . . ? 
N2 C3 H3C 109.5 . . ? 
H3A C3 H3C 109.5 . . ? 
H3B C3 H3C 109.5 . . ? 
N2 C4 N3 126.5(2) . . ? 
N2 C4 C6 122.4(2) . . ? 
N3 C4 C6 111.1(2) . . ? 
N3 C5 N4 113.4(2) . . ? 
N3 C5 H5 123.3 . . ? 
N4 C5 H5 123.3 . . ? 
C4 C6 N4 105.7(2) . . ? 
C4 C6 C7 122.5(2) . . ? 
N4 C6 C7 131.8(2) . . ? 
O2 C7 N1 121.1(2) . . ? 
O2 C7 C6 126.3(2) . . ? 
N1 C7 C6 112.6(2) . . ? 
O3 C8 O4 124.2(2) . . ? 
O3 C8 C9 124.0(2) . . ? 
O4 C8 C9 111.8(2) . . ? 
N5 C9 C10 123.0(2) . . ? 
N5 C9 C8 114.9(2) . . ? 
C10 C9 C8 122.1(2) . . ? 
C11 C10 C9 119.1(2) . . ? 
C11 C10 H10 120.4 . . ? 
C9 C10 H10 120.4 . . ? 
C10 C11 C12 118.8(2) . . ? 
C10 C11 H11 120.6 . . ? 
C12 C11 H11 120.6 . . ? 
C11 C12 C13 118.1(2) . . ? 
C11 C12 H12 121.0 . . ? 
C13 C12 H12 121.0 . . ? 
N5 C13 C12 123.7(2) . . ? 
N5 C13 C14 115.7(2) . . ? 
C12 C13 C14 120.6(2) . . ? 
O5 C14 O6 123.6(2) . . ? 
O5 C14 C13 121.1(2) . . ? 
O6 C14 C13 115.3(3) . . ? 
O7 C15 O8 124.1(2) . . ? 
O7 C15 C16 122.7(2) . . ? 
O8 C15 C16 113.2(2) . . ? 
N6 C16 C17 122.9(2) . . ? 
N6 C16 C15 113.96(19) . . ? 
C17 C16 C15 123.1(2) . . ? 
C18 C17 C16 118.5(2) . . ? 
C18 C17 H17 120.8 . . ? 
C16 C17 H17 120.8 . . ? 
C19 C18 C17 119.4(2) . . ? 
C19 C18 H18 120.3 . . ? 
C17 C18 H18 120.3 . . ? 
C18 C19 C20 118.1(2) . . ? 
C18 C19 H19 120.9 . . ? 
C20 C19 H19 120.9 . . ? 
N6 C20 C19 123.3(2) . . ? 
N6 C20 C21 114.77(19) . . ? 
C19 C20 C21 122.0(2) . . ? 
O9 C21 O10 122.2(2) . . ? 
O9 C21 C20 120.3(2) . . ? 
O10 C21 C20 117.4(2) . . ? 
C7 N1 C2 126.74(19) . . ? 
C7 N1 C1 117.7(2) . . ? 
C2 N1 C1 115.4(2) . . ? 
C4 N2 C2 119.45(19) . . ? 
C4 N2 C3 121.5(2) . . ? 
C2 N2 C3 119.1(2) . . ? 
C5 N3 C4 103.71(19) . . ? 
C5 N4 C6 106.2(2) . . ? 
C5 N4 H4N 127.5(19) . . ? 
C6 N4 H4N 126.1(18) . . ? 
C13 N5 C9 117.3(2) . . ? 
C20 N6 C16 117.85(19) . . ? 
C8 O4 H4O 109.5 . . ? 
C14 O6 H6O 108(3) . . ? 
C15 O8 H8O 101(2) . . ? 
C21 O10 H10O 89(6) . . ? 
H11A O11 H11B 127(5) . . ? 
 
loop_ 
 _geom_torsion_atom_site_label_1 
 _geom_torsion_atom_site_label_2 
 _geom_torsion_atom_site_label_3 
 _geom_torsion_atom_site_label_4 
 _geom_torsion 
 _geom_torsion_site_symmetry_1 
 _geom_torsion_site_symmetry_2 
 _geom_torsion_site_symmetry_3 
 _geom_torsion_site_symmetry_4 
 _geom_torsion_publ_flag 
N2 C4 C6 N4 -178.1(2) . . . . ? 
N3 C4 C6 N4 -0.3(3) . . . . ? 
N2 C4 C6 C7 3.4(4) . . . . ? 
N3 C4 C6 C7 -178.8(2) . . . . ? 
C4 C6 C7 O2 179.5(2) . . . . ? 
N4 C6 C7 O2 1.5(4) . . . . ? 
C4 C6 C7 N1 -1.5(3) . . . . ? 
N4 C6 C7 N1 -179.5(2) . . . . ? 
O3 C8 C9 N5 2.1(4) . . . . ? 
O4 C8 C9 N5 -178.2(2) . . . . ? 
O3 C8 C9 C10 -176.8(2) . . . . ? 
O4 C8 C9 C10 3.0(3) . . . . ? 
N5 C9 C10 C11 -1.2(4) . . . . ? 
C8 C9 C10 C11 177.6(2) . . . . ? 
C9 C10 C11 C12 1.2(4) . . . . ? 
C10 C11 C12 C13 -0.1(4) . . . . ? 
C11 C12 C13 N5 -1.1(4) . . . . ? 
C11 C12 C13 C14 179.5(2) . . . . ? 
N5 C13 C14 O5 -2.9(3) . . . . ? 
C12 C13 C14 O5 176.6(2) . . . . ? 
N5 C13 C14 O6 177.1(2) . . . . ? 
C12 C13 C14 O6 -3.5(3) . . . . ? 
O7 C15 C16 N6 -6.8(3) . . . . ? 
O8 C15 C16 N6 171.81(18) . . . . ? 
O7 C15 C16 C17 173.9(2) . . . . ? 
O8 C15 C16 C17 -7.5(3) . . . . ? 
N6 C16 C17 C18 0.8(3) . . . . ? 
C15 C16 C17 C18 -180.0(2) . . . . ? 
C16 C17 C18 C19 -1.0(3) . . . . ? 
C17 C18 C19 C20 0.6(3) . . . . ? 
C18 C19 C20 N6 0.0(3) . . . . ? 
C18 C19 C20 C21 -179.6(2) . . . . ? 
N6 C20 C21 O9 -2.5(3) . . . . ? 
C19 C20 C21 O9 177.1(2) . . . . ? 
N6 C20 C21 O10 176.30(18) . . . . ? 
C19 C20 C21 O10 -4.0(3) . . . . ? 
O2 C7 N1 C2 176.2(2) . . . . ? 
C6 C7 N1 C2 -2.9(3) . . . . ? 
O2 C7 N1 C1 0.0(3) . . . . ? 
C6 C7 N1 C1 -179.1(2) . . . . ? 
O1 C2 N1 C7 -173.9(2) . . . . ? 
N2 C2 N1 C7 5.1(3) . . . . ? 
O1 C2 N1 C1 2.4(3) . . . . ? 
N2 C2 N1 C1 -178.6(2) . . . . ? 
N3 C4 N2 C2 -178.4(2) . . . . ? 
C6 C4 N2 C2 -1.0(3) . . . . ? 
N3 C4 N2 C3 1.6(4) . . . . ? 
C6 C4 N2 C3 179.0(2) . . . . ? 
O1 C2 N2 C4 176.1(2) . . . . ? 
N1 C2 N2 C4 -3.0(3) . . . . ? 
O1 C2 N2 C3 -3.9(4) . . . . ? 
N1 C2 N2 C3 177.0(2) . . . . ? 
N4 C5 N3 C4 0.5(3) . . . . ? 
N2 C4 N3 C5 177.6(2) . . . . ? 
C6 C4 N3 C5 -0.1(3) . . . . ? 
N3 C5 N4 C6 -0.7(3) . . . . ? 
C4 C6 N4 C5 0.6(3) . . . . ? 
C7 C6 N4 C5 178.9(2) . . . . ? 
C12 C13 N5 C9 1.1(3) . . . . ? 
C14 C13 N5 C9 -179.5(2) . . . . ? 
C10 C9 N5 C13 0.0(3) . . . . ? 
C8 C9 N5 C13 -178.80(19) . . . . ? 
C19 C20 N6 C16 -0.3(3) . . . . ? 
C21 C20 N6 C16 179.40(17) . . . . ? 
C17 C16 N6 C20 -0.2(3) . . . . ? 
C15 C16 N6 C20 -179.46(18) . . . . ? 
 
_diffrn_measured_fraction_theta_max    0.975 
_diffrn_reflns_theta_full              24.50 
_diffrn_measured_fraction_theta_full   0.975 
_refine_diff_density_max    0.256 
_refine_diff_density_min   -0.530 
_refine_diff_density_rms    0.051 
